# Supplementary material
Source: PubMed Central journal article supplement (PMC7316038)

**Appendix**  
**Disparities in COVID-19 Testing and Positivity in New York City**  
**Lieberman-Cribbin et al.**

**Appendix Figure 1.** Cluster analysis of the proportion of total tests/population (%) (top) and the proportion of positive tests/total tests (%) (bottom).

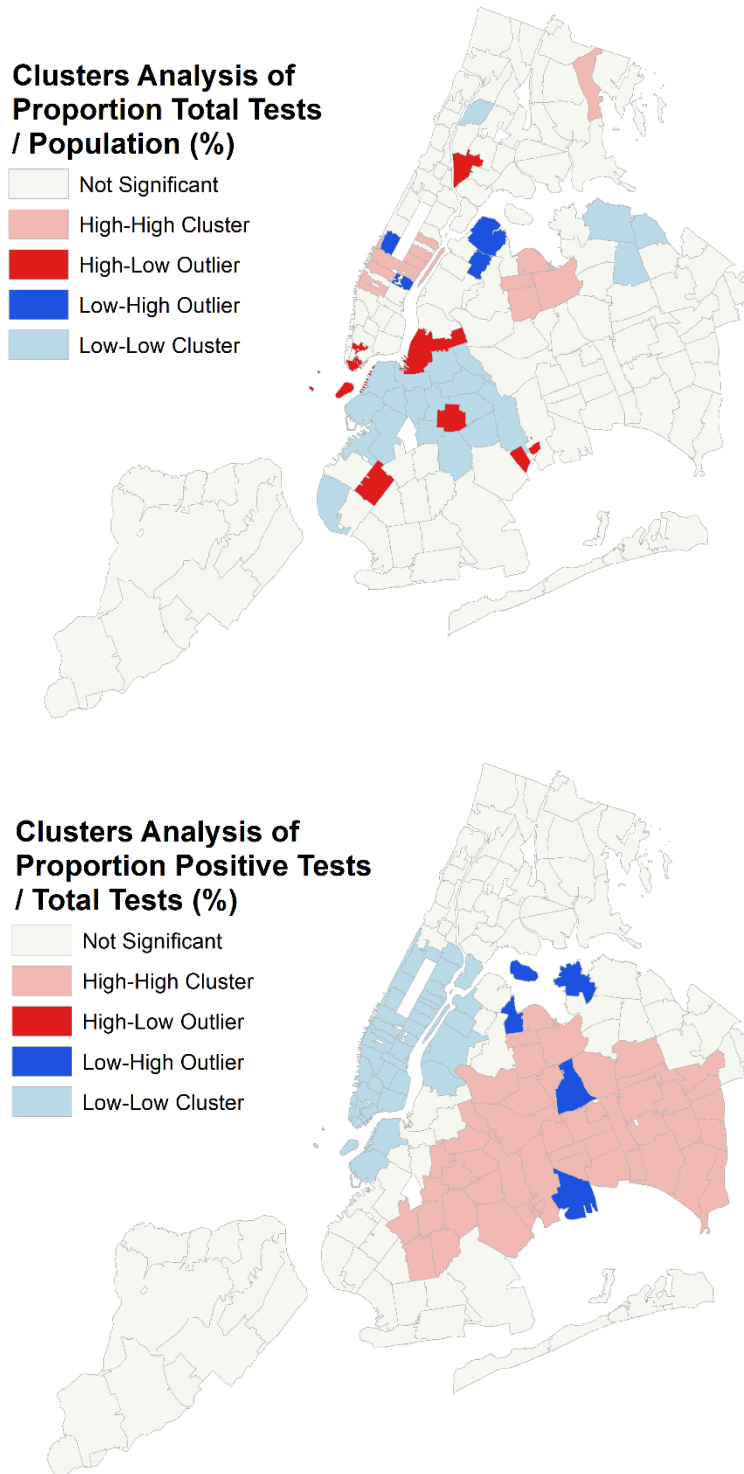

Supplement: mmc1.pdf [file mmc1.pdf]
